# Supplementary material for: Inhibition of Autophagy Increases Freezing Survival in Arabidopsis thaliana
Source: Research Square preprint supplement (doi:10.21203/rs.3.rs-6620529/v1), 2025-05-09
Supplement: Supplementary file 1 [file 090eec04643b67e570241c6f.docx]

**
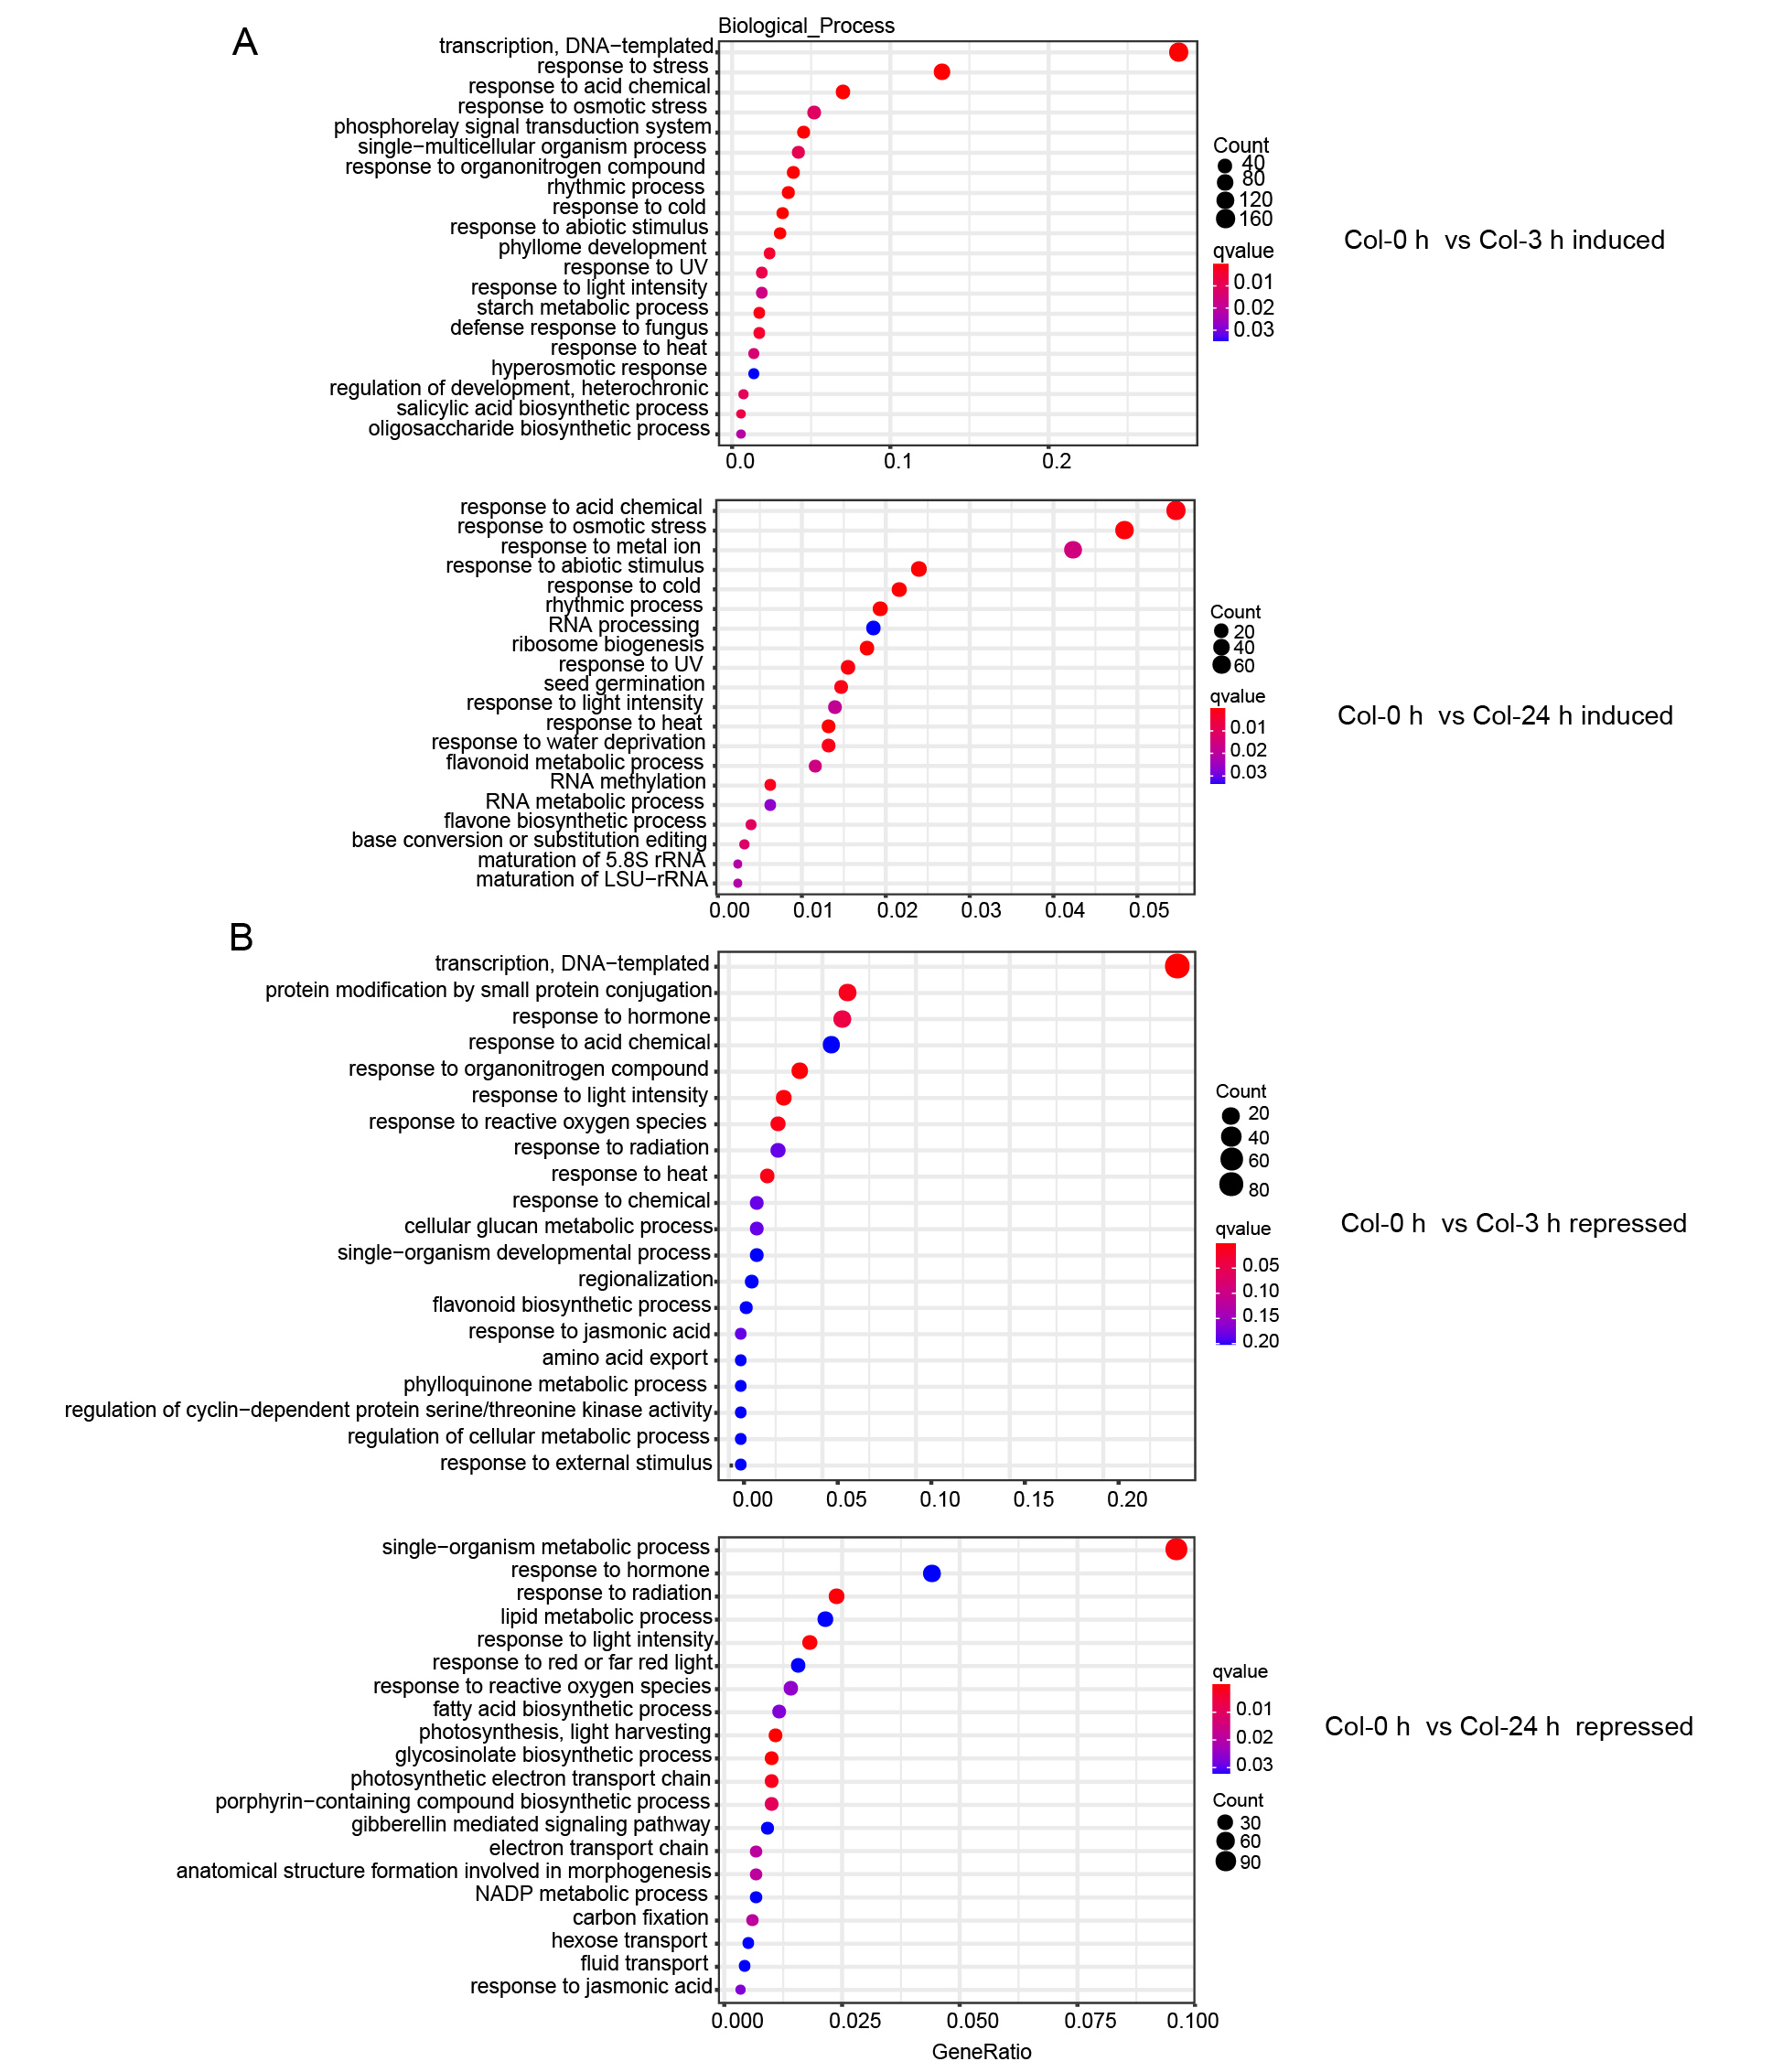
**

**Supplementary Figure 1.** GO enrichment analysis of DEGs in Col before and after cold treatment at 3 h and 24 h. The enrichment analysis of up-regulated at 3 h and 24 h (A), down-regulated 3 h and 24 h (B).


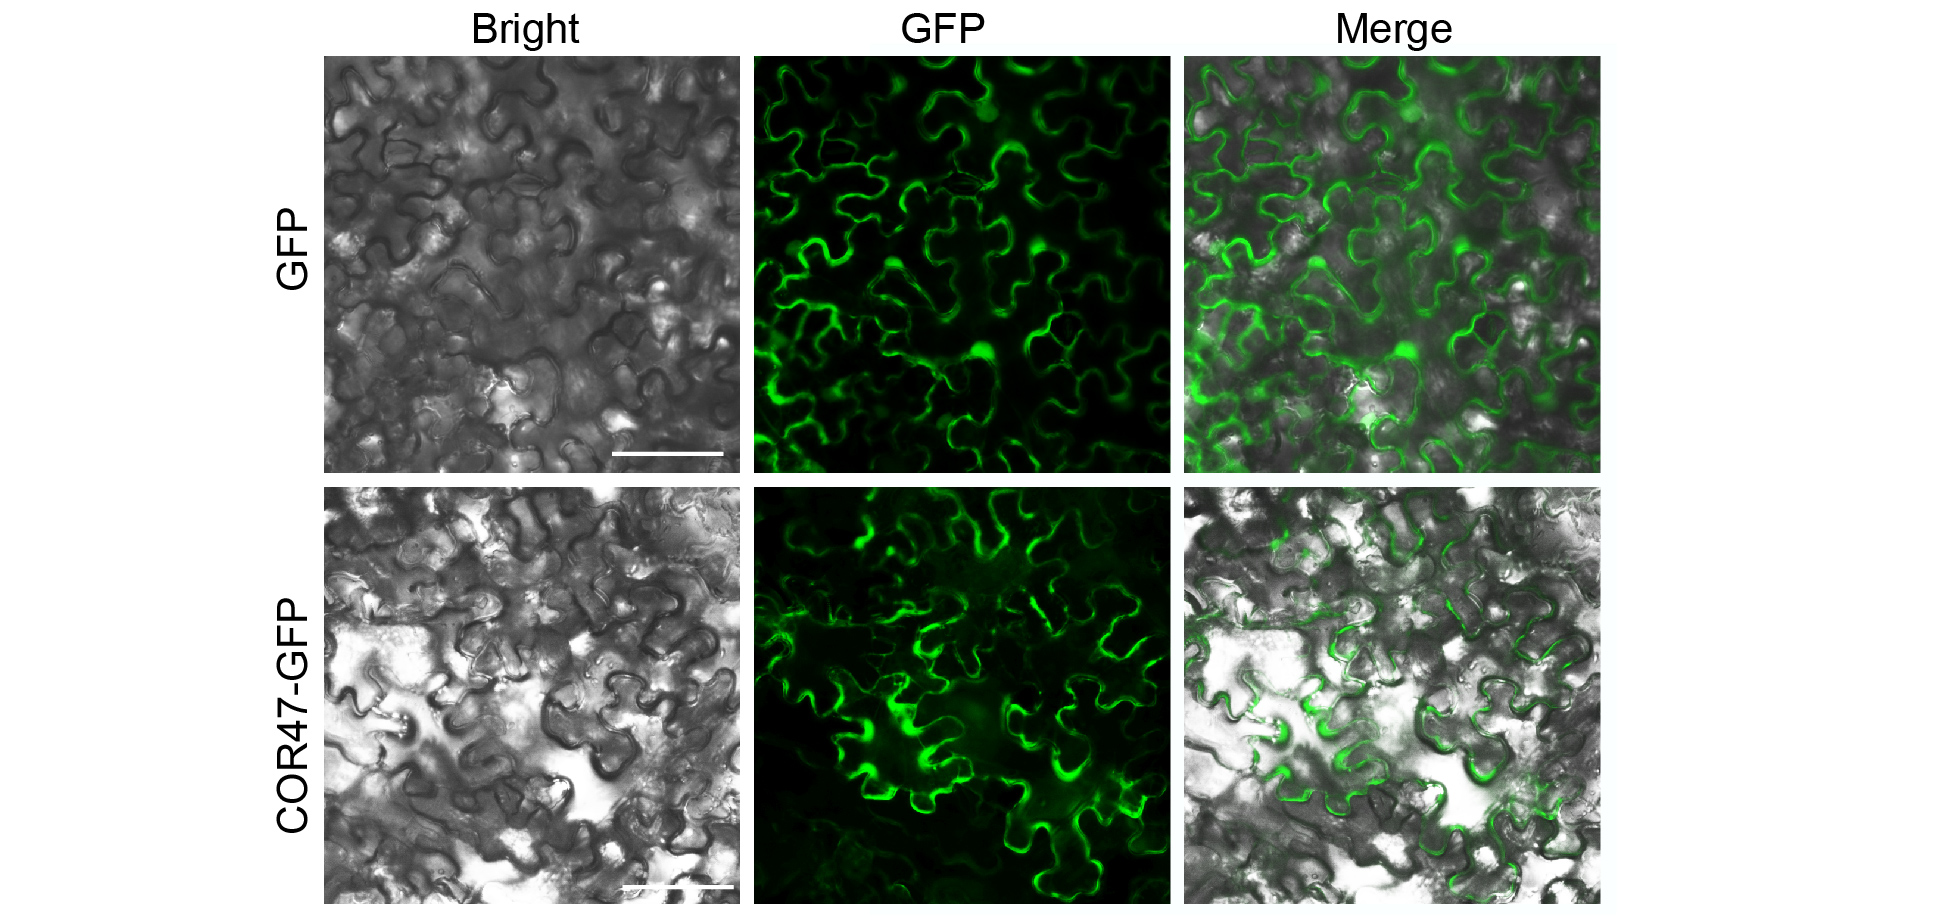


**Supplementary Figure 2.** COR47 protein is localized in the cytoplasm. Subcellular localization of free-GFP (upper panel) or COR47-GFP (lower panel) in tobacco epidermal cells. Scale bars, 40 µm.


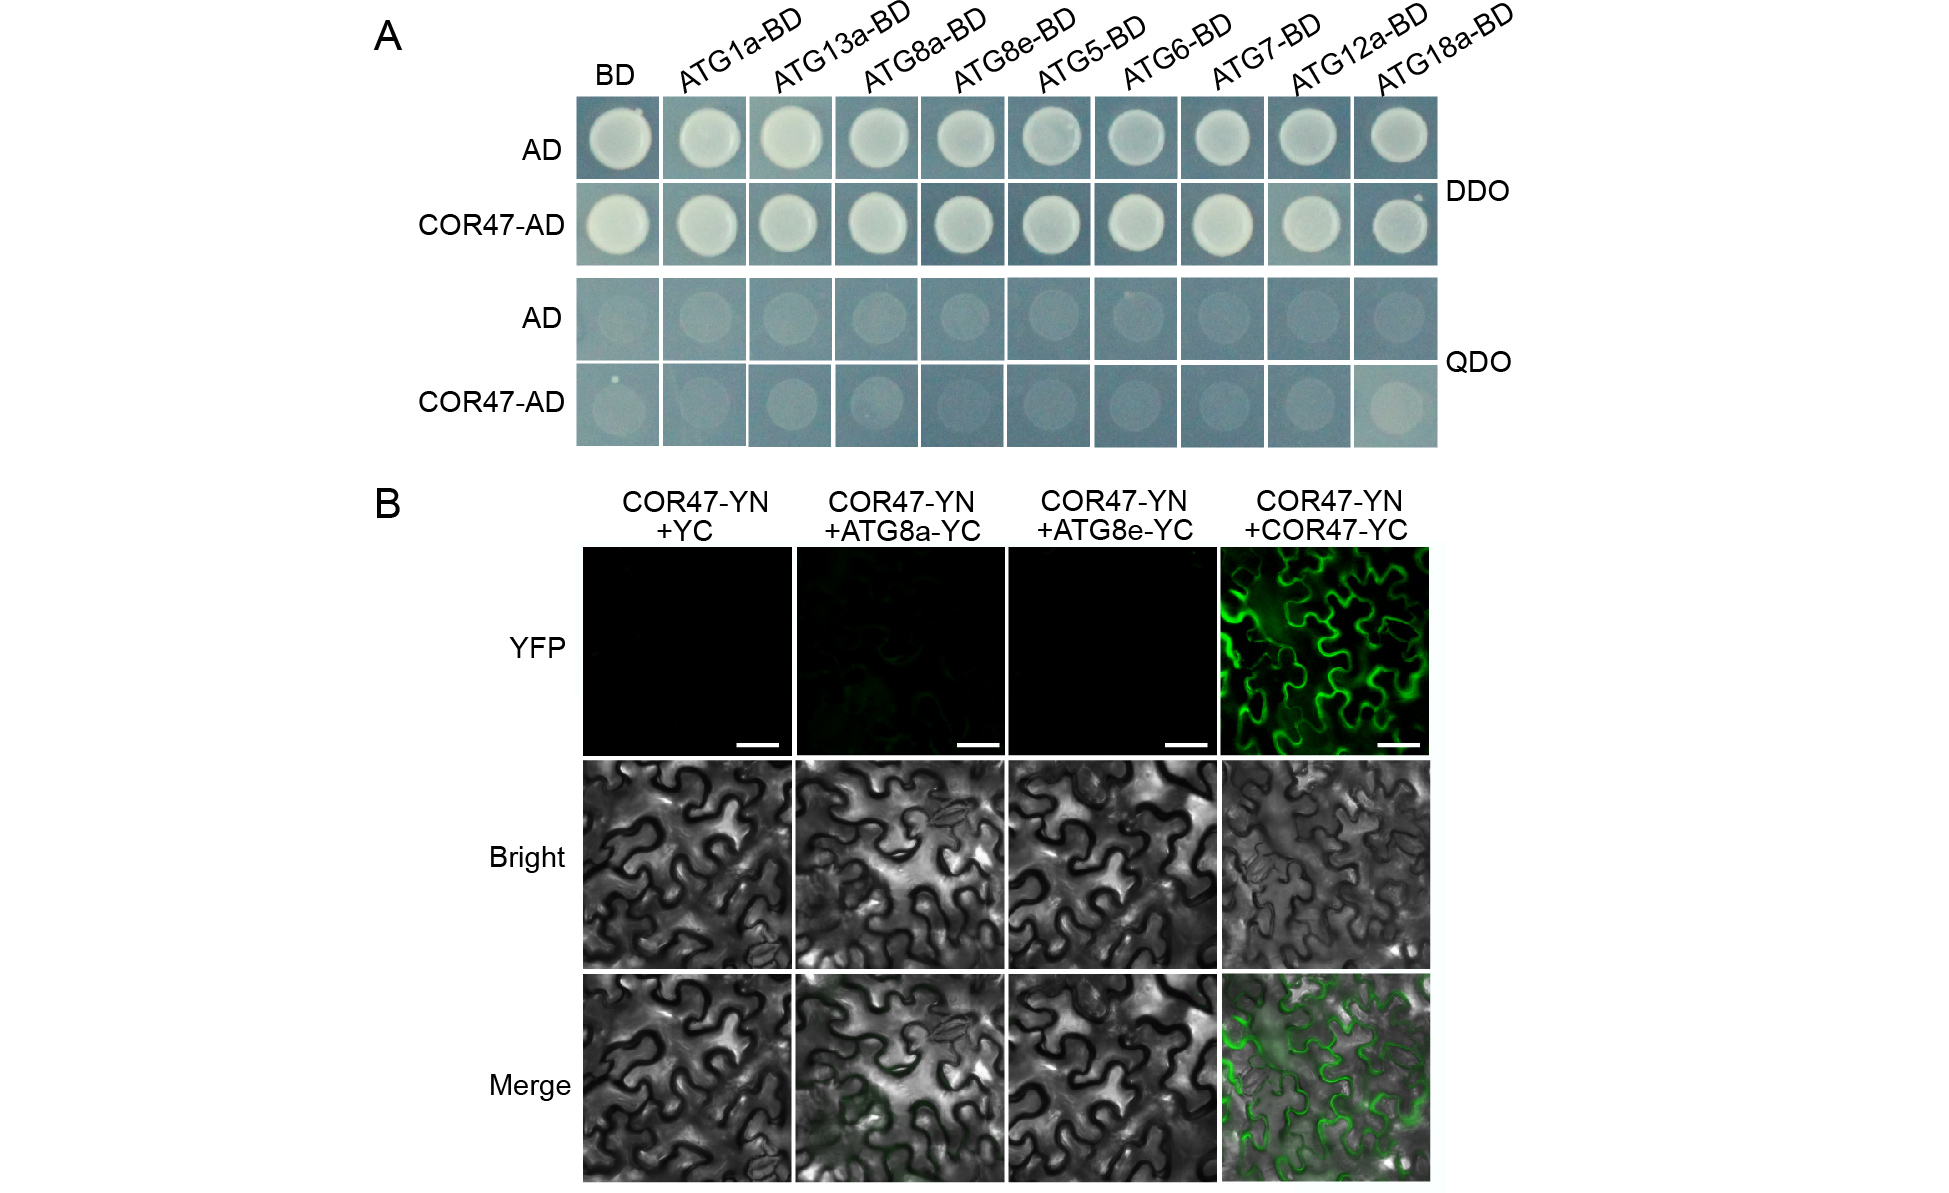


**Supplementary Figure 3.** COR47 does not directly interact with core autophagy proteins. (A) No interaction between COR47 and ATGs (ATG8a, ATG8e, ATG1a, ATG13a, ATG5, ATG6, ATG7, ATG12a, or ATG18a) in yeast two-hybrid (Y2H) assays. DDO, SD medium lacking Trp and Leu; QDO, SD medium lacking Trp, Leu, His, and Ade. (B) No interaction between COR47 and ATG8a/ATG8e in bimolecular fluorescence complementation (BiFC) assays. Scale bars, 40 µm.

**Supplementary Table 1. Primers used for the qRT-PCR analysis in this study.**

| Primer Name | Sequence (5'-3') |
| --- | --- |
| qCBF1-F | GCATGTCTCAACTTCGCTGA |
| qCBF1-R | ATCGTCTCCTCCATGTCCAG |
| qCBF2-F | TGACGTGTCCTTATGGAGCTA |
| qCBF2-R | CTGCACTCAAAAACATTTGCA |
| qCBF3-F | GATGACGACGTATCGTTATGGA |
| qCBF3-R | TACACTCGTTTCTCAGTTTTACAAAC |
| qCOR15a-F | GCTTCAGATTTCGTGACGGATAAAAC |
| qCOR15a-R | GCAAAACATTAAAGAATGTGACGGTG |
| qCOR47-F | CAGTGTCGGAGAGTGTGGTG |
| qCOR47-R | ACAGCTGGTGAATCCTCTGC |
| qGols3-F | GGAGTGGTTGGTCTGGCTAA |
| qGols3-R | TTGGTTATCCGGTGGGTAAA |
| qDDF1-F | GTGCGGGAAGGAGAGTGTTT |
| qDDF1-R | GTCGGTTCTCTGACTTCGCA |
| qZAT12-F | TGAAAACGTCGTCGCATCCT |
| qZAT12-R | AAGCCACTCTCTTCCCACTG |
| qB1L-F | CGCGACGGTATCGAACAGAT |
| qB1L-R | AGAGCTTTCTTAGCTCGCCG |
| qCHS-F | TCAAGCGCATGTGCGACAA |
| qCHS-R | ACTTCGACCACCACGATGTC |
| qDFR-F | GCTCTCTCCTATCACTCGGAAC |
| qDFR-R | GAGCGTTGCATAAGTCGTCC |
| qANS-F | TGCAAACGATCAAGCCACTG |
| qANS-R | ACTCACTCGTTGCTTCTATGT |
| qATG5-F | ACTGATACCATGTGAAGGAG |
| qATG5-R | GTATAGGCATCAAGATCACC |
| qATG7-F | GAAGATTGTCTAGGTCGTGG |
| qATG7-R | CCTGCTTTCTCTTGTATCGG |
| qATG13a-F | TCTCGTGGTCGTACTCGTGAG |
| qATG13a-R | TATCGTTTGAAATCGGATGGAC |
| qATG13b-F | GCAGGAGGTCAAGCAGTAATAAG |
| qATG13b-R | AACCGATAAGCAAAGTCTACCA |
| qATG8a-F | CGAATCGCAATGGCTAAGAGTT |
| qATG8a-R | CATCAATGCAGCAGTTGGAGG |
| qATG8e-F | ACCTTGTGCCATCAGACCTAAC |
| qATG8e-R | AGCCATCTTCGTCTTTCTTATCC |
